# Supplementary material
Source: HighWire-hosted journal article supplement (https://openheart.bmj.com/content/12/1/e003246)
Supplement: inline-supplementary-material-1 [file inline-supplementary-material-1.pdf]

## SUPPLEMENTS

**Supplementary table 1.** Baseline characteristics and exercise test data for the sample and in men and women, respectively.

|                                                      | Full cohort<br>N=6329 | Men<br>n=3501 | Women<br>n=2828 |
|------------------------------------------------------|-----------------------|---------------|-----------------|
| Women                                                | 44.7 %                | 0 %           | 100 %           |
| Age, years                                           | 56.1 ± 13.7           | 54.4 ± 14.3   | 58.2 ± 12.7     |
| BMI, kg/m <sup>2</sup>                               | 26.8 ± 4.0            | 27.0 ± 3.7    | 26.5 ± 4.4      |
| <b>Prevalent disease or risk factors at baseline</b> |                       |               |                 |
| IHD                                                  | 12.7 %                | 13.8 %        | 11.4 %          |
| Hypertension                                         | 26.8 %                | 26.8 %        | 26.7 %          |
| Heart failure                                        | 0.6 %                 | 0.7 %         | 0.4 %           |
| Valvulopathy                                         | 2.1 %                 | 2.2 %         | 2.0 %           |
| Diabetes mellitus                                    | 6.1 %                 | 7.3 %         | 4.6 %           |
| Hyperlipidemia                                       | 15.3 %                | 17.4 %        | 12.6 %          |
| Atrial fibrillation                                  | 2.9 %                 | 3.4 %         | 2.2 %           |
| COPD                                                 | 0.7 %                 | 0.6 %         | 0.9 %           |
| <b>Cardiac medication at baseline</b>                |                       |               |                 |
| Antihypertensive†                                    | 25.3 %                | 25.1 %        | 25.5 %          |
| Beta-blocker                                         | 18.6 %                | 17.6 %        | 19.9 %          |
| Loop diuretics                                       | 2.1 %                 | 1.9 %         | 2.4 %           |
| <b>Exercise test data</b>                            |                       |               |                 |
| SBP <sub>rest</sub> , mmHg                           | 136.0 ± 17.7          | 135.9 ± 16.7  | 136.1 ± 18.9    |
| DBP <sub>rest</sub> , mmHg                           | 78.7 ± 9.6            | 79.3 ± 9.9    | 78.0 ± 9.3      |
| SBP <sub>peak</sub> , mmHg                           | 196.6 ± 25.3          | 201.9 ± 24.9  | 190.1 ± 24.3    |
| SBP/Watt-slope                                       | 0.37 ± 0.16           | 0.33 ± 0.12   | 0.43 ± 0.18     |
| HR <sub>peak</sub> , 1/min                           | 154.9 ± 20.9          | 156.9 ± 21.5  | 152.3 ± 20.0    |
| Watt <sub>peak</sub>                                 | 173.5 ± 53.9          | 208.4 ± 44.7  | 130.1 ± 24.9    |
| Watt <sub>peak</sub> , % of predicted                | 93.4 ± 14.4           | 92.0 ± 14.3   | 95.2 ± 14.3     |
| W <sub>max</sub>                                     |                       |               |                 |
| <b>Events during follow-up, n (%)</b>                |                       |               |                 |
| Deaths, all-cause, n (%)                             | 6.4 %                 | 7.1 %         | 5.4 %           |

Continuous data presented as mean ± standard deviation.

† Angiotensin converting enzyme inhibitors, angiotensin receptor blockers, thiazide diuretics and calcium channel blockers were included as anti-hypertensive drugs.

BMI, body mass index; IHD, ischemic heart disease; COPD, chronic obstructive pulmonary disease; DBP, diastolic blood pressure; SBP, systolic blood pressure; HR, heart rate

**Supplementary table 2.** SBP response by the end of exercise and association to all-cause mortality and incident CV disease.

| SBP response by the end of exercise | Model 1<br>unadjusted | Model 2<br>adjusted | Model 3<br>adjusted |
|-------------------------------------|-----------------------|---------------------|---------------------|
|                                     | HR (95% CI)           | HR (95% CI)         | HR (95% CI)         |
| <b>All-cause mortality</b>          |                       |                     |                     |
| Per 1 mmHg SBP/1 W increase         | 1.47 (1.19 – 1.82)    | 1.22 (0.98 – 1.51)  | 1.06 (0.85 – 1.32)  |
| Per Z score increase                | 1.17 (1.07 – 1.28)    | 1.08 (0.99 – 1.19)  | 1.03 (0.94 – 1.12)  |
| <b>Incident CV disease</b>          |                       |                     |                     |
| Per 1 mmHg SBP/1 W increase         | 1.23 (1.04 – 1.45)    | 0.99 (0.83 – 1.18)  | 0.88 (0.74 – 1.05)  |
| Per Z score increase                | 1.09 (1.02 – 1.17)    | 0.99 (0.92 – 1.07)  | 0.95 (0.88 – 1.02)  |

The SBP response was based on the two last SBP measurements during exercise and indexed to the increase in work rate (W) between the same time points. Risk for all-cause mortality was analysed in the full sample (N=6329), while risk for incident CV disease was analysed in the subgroup of patients with no cardiac disease at baseline (n=5394). Model 2 was adjusted for age, sex, BMI, hypertension, diabetes, medication with betablockers, and history of CV disease (in the analysis of all-cause mortality only). Model 3 was additionally adjusted for exercise capacity (Wpeak).

SBP, systolic blood pressure. CV, cardiovascular. W, Watt. BMI, body mass index.

**Supplementary table 3.** SBP response by the end of exercise and association to all-cause mortality and incident CV disease in patients with a prescription of betablockers.

| SBP response by the end of exercise | Model 1<br>unadjusted | Model 2<br>adjusted | Model 3<br>adjusted |
|-------------------------------------|-----------------------|---------------------|---------------------|
|                                     | HR (95% CI)           | HR (95% CI)         | HR (95% CI)         |
| <b>All-cause mortality</b>          |                       |                     |                     |
| Per 1 mmHg SBP/1 W increase         | 1.17 (0.78 – 1.76)    | 1.15 (0.77 – 1.71)  | 1.06 (0.71 – 1.59)  |
| Per Z score increase                | 1.07 (0.90 – 1.26)    | 1.06 (0.90 – 1.25)  | 1.03 (0.87 – 1.21)  |
| <b>Incident CV disease</b>          |                       |                     |                     |
| Per 1 mmHg SBP/1 W increase         | 0.82 (0.57 – 1.18)    | 0.78 (0.55 – 1.12)  | 0.88 (0.74 – 1.05)  |
| Per Z score increase                | 0.92 (0.79 – 1.07)    | 0.90 (0.78 – 1.05)  | 0.87 (0.74 – 1.01)  |

The SBP response was based on the two last SBP measurements during exercise and indexed to the increase in work rate (W) between the same time points. Risk for all-cause mortality was analysed in 1179 patients on betablocker treatment, while risk for incident CV disease was analysed in the subgroup of patients with no cardiac disease at baseline (n=739). Model 2 was adjusted for age, sex, BMI, hypertension, diabetes, and history of CV disease (in the analysis of all-cause mortality only). Model 3 was additionally adjusted for exercise capacity (Wpeak).

SBP, systolic blood pressure. CV, cardiovascular. W, Watt. BMI, body mass index.
